# Supplementary material
Source: PubMed Central journal article supplement (PMC5106349)
Supplement: NIHMS780049-supplement-Supplementary_Materials.pdf [file NIHMS780049-supplement-Supplementary_Materials.pdf]

# Web-based Supplementary Materials for “Alternative Measures of Between-Study Heterogeneity in Meta-Analysis: Reducing the Impact of Outlying Studies” by

Lifeng Lin\*, Haitao Chu, and James S. Hodges

\*email: linl@umn.edu

## Web Appendix A: Sensitivity analysis

Since the weighted median in  $Q_m$  is discontinuous due to the indicator function (Parzen et al., 1994) in Equation (2) in the main text, the approach in Horowitz (1998) is applied to approximate the indicator function  $\mathbb{I}(t > 0)$  by a smooth function  $J(t)$  in the following simulations and case studies. For example,  $J(t)$  can be the scaled expit function  $J_\epsilon(t) = 1/[1 + \exp(-t/\epsilon)]$ , where  $\epsilon$  is a pre-specified small constant, say  $10^{-4}$ . This section presents sensitivity analysis on the choice of  $\epsilon$ . We use the data of the case study in Section 6.1 in the main text. Web Table 1 presents the results based on  $B = 10000$  resampling iterations.

Web Table 1: Sensitivity analysis on the choice of  $\epsilon$ .

| $\epsilon$ | $Q_m$  | $p$ -value | $\hat{\tau}_m$ (95% CI) | $H_m$ (95% CI)   | $I_m^2$ (95% CI) |
|------------|--------|------------|-------------------------|------------------|------------------|
| $10^{-2}$  | 31.340 | 0.006      | 0.298 (0, 0.561)        | 1.354 (1, 1.884) | 0.455 (0, 0.718) |
| $10^{-3}$  | 31.273 | 0.006      | 0.296 (0, 0.563)        | 1.352 (1, 1.886) | 0.453 (0, 0.719) |
| $10^{-4}$  | 31.259 | 0.006      | 0.296 (0, 0.563)        | 1.351 (1, 1.886) | 0.452 (0, 0.719) |
| $10^{-5}$  | 31.259 | 0.006      | 0.296 (0, 0.563)        | 1.351 (1, 1.886) | 0.452 (0, 0.719) |

## Web Appendix B: Artificial meta-analyses

This section illustrates that  $I_r^2$  and  $I_m^2$  can be larger than  $I^2$  and provide useful information on assessing heterogeneity. Three artificial meta-analyses were created; each contains ten studies with the same within-study variance 1. The observed effect sizes in half of the studies are  $y_i = b$ , and those in another half are  $y_i = -b$ , where  $b$  was set to 0.5, 1, and 2. Web Figure 1 presents the corresponding forest plots. Note that in these meta-analyses, the condition  $w_i(y_i - \bar{\mu})^2 = C$  is satisfied, so the equality in  $I_r^2 \leq I^2 + (1 - 2/\pi)(1 - I^2)$  holds.

Web Figure 1a shows the meta-analysis with  $b = 0.5$ . Since the observed effect size of each study is contained in the 95% CIs of all other studies, the collected studies are considered homogeneous; all of  $I^2$ ,  $I_r^2$ , and  $I_m^2$  are calculated as 0. For the meta-analysis with  $b = 1.0$  shown in Web Figure 1b, five studies report the effect size  $-1$ , lying outside

the 95% CIs  $(-0.96, 2.96)$  of the other five studies. Despite this, the 95% CIs of the total ten studies overlap in a large region, i.e.,  $(-0.96, 0.96)$ . Therefore, the between-study heterogeneity is moderate, but may not be substantial. The three heterogeneity measures are calculated as  $I^2 = 0.10$ ,  $I_r^2 = 0.43$ , and  $I_m^2 = 0.36$ ;  $I^2$  may indicate homogeneity but both  $I_r^2$  and  $I_m^2$  imply moderate heterogeneity. Web Figure 1c shows the meta-analysis with  $b = 2$ . The 95% CIs of five studies do not overlap with those in the other five studies; therefore, these studies are clearly heterogeneous. The heterogeneity measures are calculated as  $I^2 = 0.78$ ,  $I_r^2 = 0.86$ , and  $I_m^2 = 0.84$ ; all suggest considerable heterogeneity.

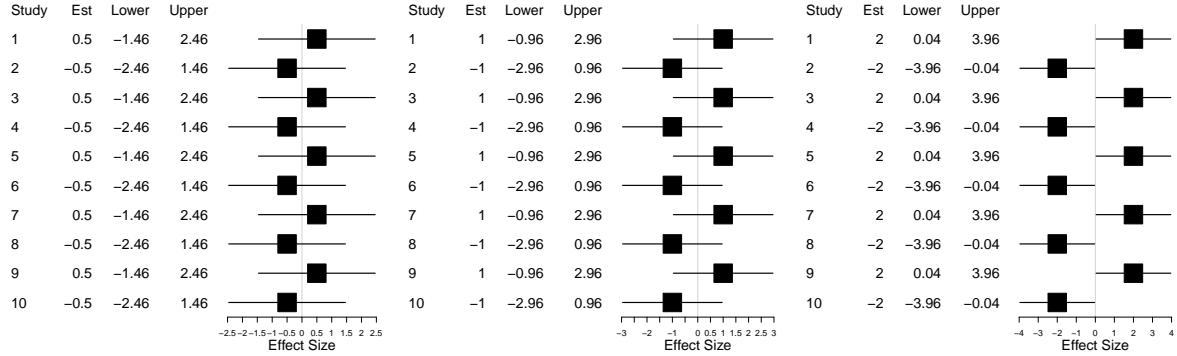

(a)  $I^2 = I_r^2 = I_m^2 = 0$ . (b)  $I^2 = 0.10$ ,  $I_r^2 = 0.43$ ,  $I_m^2 = 0.36$ . (c)  $I^2 = 0.78$ ,  $I_r^2 = 0.86$ ,  $I_m^2 = 0.84$ .

Web Figure 1: Forest plots of the three artificial meta-analyses. The column “Est” contains the observed effect size in each study; the columns “Lower” and “Upper” contain the lower and upper bounds of the corresponding 95% CI.

## Web Appendix C: Proofs

The proofs will frequently use the property about the mean of folded normal distribution: if  $X \sim N(\mu, \sigma^2)$ , then  $E|X| = \sigma\sqrt{\frac{2}{\pi}}e^{-\mu^2/(2\sigma^2)} + \mu(1 - 2\Phi(-\mu/\sigma))$ , where  $\Phi(\cdot)$  is the cumulative density function of standard normal distribution. Let  $\lfloor x \rfloor$  be the largest integer less than or equal to  $x$ .

*Proof of Proposition 1.* Note that  $\bar{\mu} = \frac{\sum_{i=1}^n w_i y_i / n}{\sum_{i=1}^n w_i / n} \xrightarrow{P} \frac{E[w_1 y_1]}{E[w_1]} = \mu$ , we have

$$\begin{aligned}
 Q/n &= \frac{1}{n} \sum_{i=1}^n w_i [(y_i - \mu) - (\bar{\mu} - \mu)]^2 \\
 &= \frac{1}{n} \sum_{i=1}^n w_i (y_i - \mu)^2 - 2(\bar{\mu} - \mu) \cdot \frac{1}{n} \sum_{i=1}^n w_i (y_i - \mu) + (\bar{\mu} - \mu)^2 \cdot \frac{1}{n} \sum_{i=1}^n w_i \\
 &\xrightarrow{P} E[w_1 (y_1 - \mu)^2] = 1.
 \end{aligned}$$

Therefore,  $I^2 = 1 - \frac{1}{Q/(n-1)} \xrightarrow{P} 0$ .

For  $Q_r$ , applying the triangle inequality  $|x| - |y| \leq |x - y|$ , we have

$$\begin{aligned}
 \sqrt{w_i} |y_i - \bar{\mu}| - \sqrt{w_i} |y_i - \mu| &\leq \sqrt{w_i} |\bar{\mu} - \mu|; \\
 \sqrt{w_i} |y_i - \mu| - \sqrt{w_i} |y_i - \bar{\mu}| &\leq \sqrt{w_i} |\bar{\mu} - \mu|.
 \end{aligned}$$

Averaging each of the above two inequalities for  $i = 1, \dots, n$ , we have

$$\left| Q_r/n - \frac{1}{n} \sum_{i=1}^n \sqrt{w_i} |y_i - \mu| \right| \leq |\bar{\mu} - \mu| \cdot \frac{1}{n} \sum_{i=1}^n \sqrt{w_i} \xrightarrow{P} 0.$$

Furthermore,

$$\frac{1}{n} \sum_{i=1}^n \sqrt{w_i} |y_i - \mu| \xrightarrow{P} \mathbb{E}[|\sqrt{w_1}(y_1 - \mu)|] = \sqrt{2/\pi}.$$

Therefore,  $Q_r/n \xrightarrow{P} \sqrt{2/\pi}$ , and  $I_r^2 = 1 - \frac{n-1}{n} \cdot \frac{2/\pi}{(Q_r/n)^2} \xrightarrow{P} 0$ .

For  $Q_m$ , by the theory of M-estimation (Huber and Ronchetti, 2009), the weighted median  $\hat{\mu}_m \xrightarrow{P} \mu$ . Similarly applying the triangle inequality, we have

$$\left| Q_m/n - \frac{1}{n} \sum_{i=1}^n \sqrt{w_i} |y_i - \mu| \right| \leq |\hat{\mu}_m - \mu| \cdot \frac{1}{n} \sum_{i=1}^n \sqrt{w_i} \xrightarrow{P} 0.$$

Hence,  $Q_m/n \xrightarrow{P} \mathbb{E}[|\sqrt{w_1}(y_1 - \mu)|] = \sqrt{2/\pi}$  and  $I_m^2 = 1 - \frac{2/\pi}{(Q_m/n)^2} \xrightarrow{P} 0$ .  $\square$

*Proof of Proposition 2.* Now, the weights  $w_i$  have a common value  $w = 1/\sigma^2$ . Under the random-effects setting, the weighted average and weighted median still converge to the true overall effect size  $\mu$  in probability. Similarly to the derivations in Proposition 1,  $Q/n \xrightarrow{P} \mathbb{E}[w(y_1 - \mu)^2] = (\sigma^2 + \tau^2)/\sigma^2$ ; both  $Q_r/n$  and  $Q_m/n$  converge to  $\mathbb{E}[|\sqrt{w}(y_1 - \mu)|] = \sqrt{\frac{2}{\pi}} \sqrt{(\sigma^2 + \tau^2)/\sigma^2}$ . Hence,  $I^2 = 1 - \frac{1}{Q/(n-1)} \xrightarrow{P} I_0^2$ ,  $I_r^2 = 1 - \frac{n-1}{n} \cdot \frac{2/\pi}{(Q_r/n)^2} \xrightarrow{P} I_0^2$ , and  $I_m^2 = 1 - \frac{2/\pi}{(Q_m/n)^2} \xrightarrow{P} I_0^2$ , where  $I_0^2 = \tau^2/(\sigma^2 + \tau^2)$ .  $\square$

*Proof of Proposition 3.* Without loss of generality, let  $y_i = z_i + C$  for  $i = 1, \dots, \lfloor n\eta \rfloor$  and  $y_i = z_i$  for  $i = \lfloor n\eta \rfloor + 1, \dots, n$ , where  $z_i \stackrel{\text{iid}}{\sim} N(\mu, \sigma^2 + \tau^2)$ . Denote the weights  $w_i = w = 1/\sigma^2$ .

Note that  $\bar{\mu} = \frac{\sum_{i=1}^n y_i}{n} = \frac{\lfloor n\eta \rfloor}{n} \cdot \frac{\sum_{i=1}^{\lfloor n\eta \rfloor} (z_i + C)}{\lfloor n\eta \rfloor} + \frac{n - \lfloor n\eta \rfloor}{n} \cdot \frac{\sum_{i=\lfloor n\eta \rfloor + 1}^n z_i}{n - \lfloor n\eta \rfloor} \xrightarrow{P} \eta(\mu + C) + (1 - \eta)\mu = \mu + \eta C$ . Therefore,

$$\begin{aligned} Q/n &= \frac{w}{n} \sum_{i=1}^n [(y_i - \mu - \eta C) - (\bar{\mu} - \mu - \eta C)]^2 \\ &= \frac{w}{n} \sum_{i=1}^n (y_i - \mu - \eta C)^2 - 2w(\bar{\mu} - \mu - \eta C) \cdot \frac{1}{n} \sum_{i=1}^n (y_i - \mu - \eta C) + w(\bar{\mu} - \mu - \eta C)^2. \end{aligned}$$

The last two terms on the right hand side converge to 0 in probability. For the first term,

$$\begin{aligned} &\frac{w}{n} \sum_{i=1}^n (y_i - \mu - \eta C)^2 \\ &= w \frac{\lfloor n\eta \rfloor}{n} \cdot \frac{\sum_{i=1}^{\lfloor n\eta \rfloor} (z_i - \mu + (1 - \eta)C)^2}{\lfloor n\eta \rfloor} + w \frac{n - \lfloor n\eta \rfloor}{n} \cdot \frac{\sum_{i=\lfloor n\eta \rfloor + 1}^n (z_i - \mu - \eta C)^2}{n - \lfloor n\eta \rfloor} \\ &\xrightarrow{P} w\eta \mathbb{E}[(z_1 - \mu + (1 - \eta)C)^2] + w(1 - \eta) \mathbb{E}[(z_1 - \mu - \eta C)^2] \\ &= \eta[\sigma^2 + \tau^2 + (1 - \eta)^2 C^2]/\sigma^2 + (1 - \eta)(\sigma^2 + \tau^2 + \eta^2 C^2)/\sigma^2 \\ &= (\sigma^2 + \tau^2)/\sigma^2 + \eta(1 - \eta)C^2/\sigma^2 \\ &= (1 - I_0^2)^{-1} + r_1 r_2, \end{aligned}$$

where  $I_0^2 = \tau^2/(\sigma^2 + \tau^2)$ ,  $r_1 = (1 - \eta)C/\sigma$ , and  $r_2 = \eta C/\sigma$ . Therefore,  $Q/n \xrightarrow{P} (1 - I_0^2)^{-1} + r_1 r_2$  and

$$I^2 = 1 - \frac{1}{Q/(n-1)} \xrightarrow{P} 1 - [(1 - I_0^2)^{-1} + r_1 r_2]^{-1}.$$

To derive the asymptotic value of  $I_r^2$ , we apply the triangle inequality again as in the proof of Proposition 1, and obtain

$$\left| Q_r/n - \frac{\sqrt{w}}{n} \sum_{i=1}^n |y_i - \mu - \eta C| \right| \leq \sqrt{w} |\bar{\mu} - \mu - \eta C| \xrightarrow{P} 0.$$

Note that

$$\begin{aligned} & \frac{\sqrt{w}}{n} \sum_{i=1}^n |y_i - \mu - \eta C| \\ &= \sqrt{w} \frac{\lfloor n\eta \rfloor}{n} \cdot \frac{\sum_{i=1}^{\lfloor n\eta \rfloor} |z_i - \mu + (1 - \eta)C|}{\lfloor n\eta \rfloor} + \sqrt{w} \frac{n - \lfloor n\eta \rfloor}{n} \cdot \frac{\sum_{i=n-\lfloor n\eta \rfloor+1}^n |z_i - \mu - \eta C|}{n - \lfloor n\eta \rfloor} \\ &\xrightarrow{P} \sqrt{w} \eta \mathbb{E}[|z_1 - \mu + (1 - \eta)C|] + \sqrt{w}(1 - \eta) \mathbb{E}[|z_1 - \mu - \eta C|] \\ &= \frac{\eta}{\sigma} \left[ \sqrt{\sigma^2 + \tau^2} \sqrt{\frac{2}{\pi}} \exp\left(-\frac{(1 - \eta)^2 C^2}{2(\sigma^2 + \tau^2)}\right) + (1 - \eta)C \left(1 - 2\Phi\left(-\frac{(1 - \eta)C}{\sqrt{\sigma^2 + \tau^2}}\right)\right) \right] \\ &\quad + \frac{1 - \eta}{\sigma} \left[ \sqrt{\sigma^2 + \tau^2} \sqrt{\frac{2}{\pi}} \exp\left(-\frac{\eta^2 C^2}{2(\sigma^2 + \tau^2)}\right) - \eta C \left(1 - 2\Phi\left(\frac{\eta C}{\sqrt{\sigma^2 + \tau^2}}\right)\right) \right] \\ &= \eta \left[ \sqrt{\frac{2}{\pi}} (1 - I_0^2)^{-1/2} \exp\left(-\frac{1}{2} r_1^2 (1 - I_0^2)\right) + r_1 (1 - 2\Phi(-r_1 (1 - I_0^2)^{1/2})) \right] \\ &\quad + (1 - \eta) \left[ \sqrt{\frac{2}{\pi}} (1 - I_0^2)^{-1/2} \exp\left(-\frac{1}{2} r_2^2 (1 - I_0^2)\right) - r_2 (1 - 2\Phi(r_2 (1 - I_0^2)^{1/2})) \right]. \end{aligned}$$

Therefore,  $Q_r/n$  also converges to the value above in probability, and

$$\begin{aligned} I_r^2 &= 1 - \frac{n-1}{n} \cdot \frac{2/\pi}{(Q_r/n)^2} \\ &\xrightarrow{P} 1 - \left\{ \eta \left[ (1 - I_0^2)^{-1/2} \exp\left(-\frac{1}{2} r_1^2 (1 - I_0^2)\right) + \sqrt{\frac{\pi}{2}} r_1 (1 - 2\Phi(-r_1 (1 - I_0^2)^{1/2})) \right] \right. \\ &\quad \left. + (1 - \eta) \left[ (1 - I_0^2)^{-1/2} \exp\left(-\frac{1}{2} r_2^2 (1 - I_0^2)\right) - \sqrt{\frac{\pi}{2}} r_2 (1 - 2\Phi(r_2 (1 - I_0^2)^{1/2})) \right] \right\}^{-2}. \end{aligned}$$

Finally, we derive the asymptotic value of  $I_m^2$ . The weighted median  $\hat{\mu}_m$  is defined as the solution to  $\sum_{i=1}^n \psi(\theta) = 0$ , where  $\psi(\theta) = w[\mathbb{I}(\theta \geq y_i) - 0.5]$ . Equivalently,  $\hat{\mu}_m$  is the solution to  $\sum_{i=1}^n \tilde{\psi}(\theta) = 0$ , where  $\tilde{\psi}(\theta) = \mathbb{I}(\theta \geq y_i) - 0.5$  as we assume that the weights are equal. By the theory of M-estimation (Huber and Ronchetti, 2009),  $\hat{\mu}_m \xrightarrow{P} \mu_0$ , where

$\mu_0$  is the solution to  $\mathbb{E}[\tilde{\psi}(\theta)] = 0$ . Specifically,

$$\begin{aligned}\mathbb{E}[\tilde{\psi}(\theta)] &= \Pr(\theta \geq y_i) - 0.5 \\ &= \Pr(\theta \geq y_i, 1 \leq i \leq \lfloor n\eta \rfloor) + \Pr(\theta \geq y_i, \lfloor n\eta \rfloor + 1 \leq i \leq n) - 0.5 \\ &= \eta \Pr(z_i \leq \theta - C) + (1 - \eta) \Pr(z_i \leq \theta) - 0.5 \\ &= \eta \Phi\left(\frac{\theta - \mu - C}{\sqrt{\sigma^2 + \tau^2}}\right) + (1 - \eta) \Phi\left(\frac{\theta - \mu}{\sqrt{\sigma^2 + \tau^2}}\right) - 0.5.\end{aligned}$$

Therefore,  $\mu_0$  satisfied the following equation:

$$\eta \Phi\left(-\frac{\mu + C - \mu_0}{\sqrt{\sigma^2 + \tau^2}}\right) + (1 - \eta) \Phi\left(\frac{\mu_0 - \mu}{\sqrt{\sigma^2 + \tau^2}}\right) = 0.5. \quad (1)$$

Applying the triangle inequality as in the proof of Proposition 1, we have

$$\left|Q_m/n - \frac{\sqrt{w}}{n} \sum_{i=1}^n |y_i - \mu_0|\right| \leq \sqrt{w} |\hat{\mu}_m - \mu_0| \xrightarrow{P} 0.$$

Note that

$$\begin{aligned}& \frac{\sqrt{w}}{n} \sum_{i=1}^n |y_i - \mu_0| \\ &= \sqrt{w} \frac{\lfloor n\eta \rfloor}{n} \cdot \frac{\sum_{i=1}^{\lfloor n\eta \rfloor} |z_i - \mu_0 + C|}{\lfloor n\eta \rfloor} + \sqrt{w} \frac{n - \lfloor n\eta \rfloor}{n} \cdot \frac{\sum_{i=\lfloor n\eta \rfloor+1}^n |z_i - \mu_0|}{n - \lfloor n\eta \rfloor} \\ &\xrightarrow{P} \sqrt{w\eta} \mathbb{E}[|z_1 - \mu_0 + C|] + \sqrt{w}(1 - \eta) \mathbb{E}[|z_1 - \mu_0|] \\ &= \frac{\eta}{\sigma} \left[ \sqrt{\sigma^2 + \tau^2} \sqrt{\frac{2}{\pi}} \exp\left(-\frac{(\mu - \mu_0 + C)^2}{2(\sigma^2 + \tau^2)}\right) + (\mu - \mu_0 + C) \left(1 - 2\Phi\left(-\frac{\mu - \mu_0 + C}{\sqrt{\sigma^2 + \tau^2}}\right)\right) \right] \\ &\quad + \frac{1 - \eta}{\sigma} \left[ \sqrt{\sigma^2 + \tau^2} \sqrt{\frac{2}{\pi}} \exp\left(-\frac{(\mu - \mu_0)^2}{2(\sigma^2 + \tau^2)}\right) + (\mu - \mu_0) \left(1 - 2\Phi\left(-\frac{\mu - \mu_0}{\sqrt{\sigma^2 + \tau^2}}\right)\right) \right] \\ &= \eta \left[ \sqrt{\frac{2}{\pi}} (1 - I_0^2)^{-1/2} \exp\left(-\frac{1}{2} s_1^2 (1 - I_0^2)\right) + s_1 (1 - 2\Phi(-s_1(1 - I_0^2)^{1/2})) \right] \\ &\quad + (1 - \eta) \left[ \sqrt{\frac{2}{\pi}} (1 - I_0^2)^{-1/2} \exp\left(-\frac{1}{2} s_2^2 (1 - I_0^2)\right) - s_2 (1 - 2\Phi(s_2(1 - I_0^2)^{1/2})) \right],\end{aligned}$$

where  $s_1 = (\mu + C - \mu_0)/\sigma$  and  $s_2 = (\mu_0 - \mu)/\sigma$ . Therefore,

$$\begin{aligned}I_m^2 &= 1 - \frac{2/\pi}{(Q_m/n)^2} \\ &\xrightarrow{P} 1 - \left\{ \eta \left[ (1 - I_0^2)^{-1/2} \exp\left(-\frac{1}{2} s_1^2 (1 - I_0^2)\right) + \sqrt{\frac{\pi}{2}} s_1 (1 - 2\Phi(-s_1(1 - I_0^2)^{1/2})) \right] \right. \\ &\quad \left. + (1 - \eta) \left[ (1 - I_0^2)^{-1/2} \exp\left(-\frac{1}{2} s_2^2 (1 - I_0^2)\right) - \sqrt{\frac{\pi}{2}} s_2 (1 - 2\Phi(s_2(1 - I_0^2)^{1/2})) \right] \right\}^{-2}.\end{aligned}$$

Notice that  $s_2 = C/\sigma - s_1$  and Equation (1) can be rewritten as

$$\eta \Phi(-s_1(1 - I_0^2)^{1/2}) + (1 - \eta) \Phi((C/\sigma - s_1)(1 - I_0^2)^{1/2}) = 0.5; \quad (2)$$

that is,  $s_1$  is the solution to Equation (2). This completes the proof.  $\square$

## Web Appendix D: Complete simulation results

The simulation settings have been detailed in the main text. Web Tables 2–4 present the complete results.

Web Table 2: Simulation results for meta-analyses containing 10 studies with outliers in Scenario I. RMSE: root mean squared error; CP: coverage probability of 95% confidence interval. †Size for homogeneous studies ( $\tau^2 = 0$ ) and power for heterogeneous studies ( $\tau^2 > 0$ ) at the significance level  $\alpha = 0.05$ . ‡The sizes/powers outside the parentheses are produced by the resampling method; those inside the parentheses are obtained using  $Q$ 's theoretical distribution under the null hypothesis.

| Outlier pattern                                                                         | Size/power <sup>†</sup> |       |       | RMSE                |                  |                  | CP (%)              |                  |                  |
|-----------------------------------------------------------------------------------------|-------------------------|-------|-------|---------------------|------------------|------------------|---------------------|------------------|------------------|
|                                                                                         | $Q^\ddagger$            | $Q_r$ | $Q_m$ | $\hat{\tau}_{DL}^2$ | $\hat{\tau}_r^2$ | $\hat{\tau}_m^2$ | $\hat{\tau}_{DL}^2$ | $\hat{\tau}_r^2$ | $\hat{\tau}_m^2$ |
| Scenario I (contamination) with $\tau^2 = 0$ (homogeneity) and $s_i \sim U(0.5, 1)$ :   |                         |       |       |                     |                  |                  |                     |                  |                  |
| No outliers                                                                             | 0.04 (0.05)             | 0.04  | 0.04  | 0.18                | 0.22             | 0.16             | 100                 | 100              | 100              |
| $C$                                                                                     | 0.74 (0.74)             | 0.53  | 0.47  | 1.04                | 0.80             | 0.56             | 99                  | 98               | 100              |
| $(C, C)$                                                                                | 0.97 (0.97)             | 0.93  | 0.91  | 1.70                | 1.68             | 1.16             | 92                  | 92               | 98               |
| $(C, -C)$                                                                               | 0.98 (0.98)             | 0.93  | 0.92  | 2.14                | 1.55             | 1.24             | 91                  | 91               | 97               |
| $(C, C, C)$                                                                             | 0.99 (0.99)             | 0.99  | 0.99  | 2.21                | 2.66             | 1.91             | 48                  | 55               | 78               |
| $(C, C, -C)$                                                                            | 1.00 (1.00)             | 0.99  | 1.00  | 3.01                | 2.57             | 2.07             | 48                  | 57               | 79               |
| Scenario I (contamination) with $\tau^2 = 1$ (heterogeneity) and $s_i \sim U(0.5, 1)$ : |                         |       |       |                     |                  |                  |                     |                  |                  |
| No outliers                                                                             | 0.75 (0.74)             | 0.72  | 0.70  | 0.72                | 0.82             | 0.71             | 76                  | 88               | 82               |
| $C$                                                                                     | 0.99 (0.98)             | 0.97  | 0.97  | 2.24                | 1.89             | 1.37             | 98                  | 98               | 99               |
| $(C, C)$                                                                                | 1.00 (1.00)             | 1.00  | 1.00  | 3.57                | 3.58             | 2.59             | 92                  | 93               | 98               |
| $(C, -C)$                                                                               | 1.00 (1.00)             | 1.00  | 1.00  | 4.44                | 3.49             | 2.77             | 92                  | 92               | 98               |
| $(C, C, C)$                                                                             | 1.00 (1.00)             | 1.00  | 1.00  | 4.47                | 5.29             | 3.94             | 67                  | 71               | 88               |
| $(C, C, -C)$                                                                            | 1.00 (1.00)             | 1.00  | 1.00  | 6.35                | 5.60             | 4.54             | 63                  | 70               | 86               |
| Scenario I (contamination) with $\tau^2 = 1$ (heterogeneity) and $s_i \sim U(1, 2)$ :   |                         |       |       |                     |                  |                  |                     |                  |                  |
| No outliers                                                                             | 0.26 (0.26)             | 0.22  | 0.22  | 1.27                | 1.52             | 1.21             | 76                  | 88               | 81               |
| $C$                                                                                     | 0.88 (0.89)             | 0.78  | 0.75  | 5.34                | 4.28             | 3.06             | 98                  | 98               | 99               |
| $(C, C)$                                                                                | 0.99 (0.99)             | 0.98  | 0.98  | 8.73                | 8.68             | 6.15             | 92                  | 92               | 98               |
| $(C, -C)$                                                                               | 1.00 (1.00)             | 0.99  | 0.99  | 10.81               | 8.09             | 6.48             | 91                  | 92               | 97               |
| $(C, C, C)$                                                                             | 1.00 (1.00)             | 1.00  | 1.00  | 11.02               | 13.15            | 9.66             | 56                  | 61               | 83               |
| $(C, C, -C)$                                                                            | 1.00 (1.00)             | 1.00  | 1.00  | 15.66               | 13.46            | 10.97            | 56                  | 62               | 82               |
| Scenario I (contamination) with $\tau^2 = 1$ (heterogeneity) and $s_i \sim U(2, 5)$ :   |                         |       |       |                     |                  |                  |                     |                  |                  |
| No outliers                                                                             | 0.08 (0.08)             | 0.08  | 0.07  | 4.23                | 5.28             | 3.77             | 77                  | 87               | 82               |
| $C$                                                                                     | 0.81 (0.81)             | 0.64  | 0.60  | 27.07               | 20.71            | 14.06            | 98                  | 98               | 100              |
| $(C, C)$                                                                                | 0.98 (0.98)             | 0.96  | 0.95  | 44.75               | 44.94            | 30.35            | 90                  | 90               | 97               |
| $(C, -C)$                                                                               | 1.00 (1.00)             | 0.96  | 0.96  | 55.85               | 39.94            | 31.44            | 90                  | 91               | 97               |
| $(C, C, C)$                                                                             | 1.00 (1.00)             | 1.00  | 1.00  | 56.81               | 69.04            | 49.87            | 44                  | 53               | 75               |
| $(C, C, -C)$                                                                            | 1.00 (1.00)             | 1.00  | 1.00  | 81.37               | 68.52            | 55.13            | 45                  | 54               | 74               |

Web Table 3: Simulation results for meta-analyses containing 30 studies with outliers in Scenario I. RMSE: root mean squared error; CP: coverage probability of 95% confidence interval. †Size for homogeneous studies ( $\tau^2 = 0$ ) and power for heterogeneous studies ( $\tau^2 > 0$ ) at the significance level  $\alpha = 0.05$ . ‡The sizes/powers outside the parentheses are produced by the resampling method; those inside the parentheses are obtained using  $Q$ 's theoretical distribution under the null hypothesis.

| Outlier pattern                                                                         | Size/power <sup>†</sup> |       |       | RMSE                |                  |                  | CP (%)              |                  |                  |
|-----------------------------------------------------------------------------------------|-------------------------|-------|-------|---------------------|------------------|------------------|---------------------|------------------|------------------|
|                                                                                         | $Q^\ddagger$            | $Q_r$ | $Q_m$ | $\hat{\tau}_{DL}^2$ | $\hat{\tau}_r^2$ | $\hat{\tau}_m^2$ | $\hat{\tau}_{DL}^2$ | $\hat{\tau}_r^2$ | $\hat{\tau}_m^2$ |
| Scenario I (contamination) with $\tau^2 = 0$ (homogeneity) and $s_i \sim U(0.5, 1)$ :   |                         |       |       |                     |                  |                  |                     |                  |                  |
| No outliers                                                                             | 0.05 (0.06)             | 0.05  | 0.05  | 0.10                | 0.12             | 0.10             | 98                  | 99               | 99               |
| $C$                                                                                     | 0.55 (0.55)             | 0.27  | 0.25  | 0.37                | 0.24             | 0.20             | 97                  | 97               | 98               |
| $(C, C)$                                                                                | 0.89 (0.89)             | 0.66  | 0.60  | 0.63                | 0.42             | 0.35             | 88                  | 90               | 94               |
| $(C, -C)$                                                                               | 0.92 (0.92)             | 0.61  | 0.61  | 0.68                | 0.40             | 0.36             | 89                  | 90               | 94               |
| $(C, C, C)$                                                                             | 0.98 (0.98)             | 0.90  | 0.87  | 0.88                | 0.64             | 0.53             | 65                  | 74               | 83               |
| $(C, C, -C)$                                                                            | 0.99 (0.98)             | 0.89  | 0.88  | 0.99                | 0.61             | 0.55             | 64                  | 73               | 83               |
| Scenario I (contamination) with $\tau^2 = 1$ (heterogeneity) and $s_i \sim U(0.5, 1)$ : |                         |       |       |                     |                  |                  |                     |                  |                  |
| No outliers                                                                             | 0.98 (0.99)             | 0.98  | 0.98  | 0.40                | 0.43             | 0.41             | 88                  | 93               | 91               |
| $C$                                                                                     | 1.00 (1.00)             | 1.00  | 1.00  | 0.84                | 0.63             | 0.55             | 97                  | 97               | 98               |
| $(C, C)$                                                                                | 1.00 (1.00)             | 1.00  | 1.00  | 1.37                | 1.00             | 0.85             | 93                  | 94               | 96               |
| $(C, -C)$                                                                               | 1.00 (1.00)             | 1.00  | 1.00  | 1.45                | 0.97             | 0.85             | 93                  | 94               | 96               |
| $(C, C, C)$                                                                             | 1.00 (1.00)             | 1.00  | 1.00  | 1.86                | 1.44             | 1.22             | 76                  | 83               | 90               |
| $(C, C, -C)$                                                                            | 1.00 (1.00)             | 1.00  | 1.00  | 2.05                | 1.40             | 1.25             | 77                  | 84               | 91               |
| Scenario I (contamination) with $\tau^2 = 1$ (heterogeneity) and $s_i \sim U(1, 2)$ :   |                         |       |       |                     |                  |                  |                     |                  |                  |
| No outliers                                                                             | 0.48 (0.49)             | 0.42  | 0.43  | 0.74                | 0.81             | 0.75             | 89                  | 93               | 91               |
| $C$                                                                                     | 0.89 (0.89)             | 0.78  | 0.77  | 1.97                | 1.36             | 1.17             | 98                  | 97               | 98               |
| $(C, C)$                                                                                | 0.99 (0.99)             | 0.94  | 0.94  | 3.33                | 2.29             | 1.93             | 91                  | 92               | 96               |
| $(C, -C)$                                                                               | 0.99 (0.99)             | 0.94  | 0.94  | 3.50                | 2.17             | 1.93             | 91                  | 92               | 96               |
| $(C, C, C)$                                                                             | 1.00 (1.00)             | 0.99  | 0.99  | 4.60                | 3.41             | 2.85             | 70                  | 80               | 88               |
| $(C, C, -C)$                                                                            | 1.00 (1.00)             | 0.99  | 0.99  | 5.03                | 3.24             | 2.90             | 71                  | 81               | 88               |
| Scenario I (contamination) with $\tau^2 = 1$ (heterogeneity) and $s_i \sim U(2, 5)$ :   |                         |       |       |                     |                  |                  |                     |                  |                  |
| No outliers                                                                             | 0.11 (0.11)             | 0.09  | 0.09  | 2.32                | 2.64             | 2.25             | 88                  | 92               | 91               |
| $C$                                                                                     | 0.70 (0.70)             | 0.43  | 0.41  | 9.89                | 5.96             | 5.02             | 97                  | 97               | 99               |
| $(C, C)$                                                                                | 0.96 (0.96)             | 0.81  | 0.78  | 17.19               | 10.92            | 8.97             | 90                  | 91               | 94               |
| $(C, -C)$                                                                               | 0.96 (0.96)             | 0.76  | 0.77  | 18.10               | 10.02            | 8.94             | 90                  | 91               | 95               |
| $(C, C, C)$                                                                             | 1.00 (1.00)             | 0.95  | 0.94  | 23.87               | 16.90            | 13.59            | 65                  | 74               | 82               |
| $(C, C, -C)$                                                                            | 1.00 (1.00)             | 0.95  | 0.95  | 26.10               | 15.49            | 13.78            | 64                  | 74               | 83               |

Web Table 4: Simulation results for meta-analyses containing 30 studies with outliers in Scenario II. RMSE: root mean squared error; CP: coverage probability of 95% confidence interval. †Size for homogeneous studies ( $\tau^2 = 0$ ) and power for heterogeneous studies ( $\tau^2 > 0$ ) at the significance level  $\alpha = 0.05$ . ‡The sizes/powers outside the parentheses are produced by the resampling method; those inside the parentheses are obtained using  $Q$ 's theoretical distribution under the null hypothesis.

| Outlier pattern                                                                       | Size/power <sup>†</sup> |       |       | RMSE                |                  |                  | CP (%)              |                  |                  |
|---------------------------------------------------------------------------------------|-------------------------|-------|-------|---------------------|------------------|------------------|---------------------|------------------|------------------|
|                                                                                       | $Q^\ddagger$            | $Q_r$ | $Q_m$ | $\hat{\tau}_{DL}^2$ | $\hat{\tau}_r^2$ | $\hat{\tau}_m^2$ | $\hat{\tau}_{DL}^2$ | $\hat{\tau}_r^2$ | $\hat{\tau}_m^2$ |
| Scenario II (heavy tail) with $\tau^2 = 1$ (heterogeneity) and $s_i \sim U(0.5, 1)$ : |                         |       |       |                     |                  |                  |                     |                  |                  |
| df = 3                                                                                | 0.92 (0.92)             | 0.89  | 0.88  | 1.45                | 0.59             | 0.56             | 72                  | 79               | 73               |
| df = 5                                                                                | 0.98 (0.98)             | 0.95  | 0.95  | 0.55                | 0.45             | 0.45             | 84                  | 90               | 86               |
| df = 10                                                                               | 0.98 (0.98)             | 0.97  | 0.97  | 0.43                | 0.43             | 0.42             | 88                  | 93               | 90               |
| Scenario II (heavy tail) with $\tau^2 = 1$ (heterogeneity) and $s_i \sim U(1, 2)$ :   |                         |       |       |                     |                  |                  |                     |                  |                  |
| df = 3                                                                                | 0.41 (0.40)             | 0.35  | 0.35  | 1.53                | 0.88             | 0.82             | 83                  | 90               | 87               |
| df = 5                                                                                | 0.46 (0.46)             | 0.40  | 0.40  | 0.82                | 0.82             | 0.77             | 88                  | 93               | 90               |
| df = 10                                                                               | 0.48 (0.49)             | 0.42  | 0.42  | 0.76                | 0.82             | 0.77             | 88                  | 94               | 90               |
| Scenario II (heavy tail) with $\tau^2 = 1$ (heterogeneity) and $s_i \sim U(2, 5)$ :   |                         |       |       |                     |                  |                  |                     |                  |                  |
| df = 3                                                                                | 0.10 (0.10)             | 0.10  | 0.10  | 2.66                | 2.71             | 2.33             | 88                  | 92               | 91               |
| df = 5                                                                                | 0.09 (0.09)             | 0.09  | 0.08  | 2.18                | 2.54             | 2.17             | 88                  | 93               | 92               |
| df = 10                                                                               | 0.10 (0.10)             | 0.08  | 0.09  | 2.18                | 2.48             | 2.12             | 88                  | 93               | 91               |



## References

- Horowitz, J. L. (1998). Bootstrap methods for median regression models. *Econometrica* **66**, 1327–1351.
- Huber, P. J. and Ronchetti, E. M. (2009). *Robust Statistics*. John Wiley & Sons, Hoboken, NJ, 2nd edition.
- Parzen, M. I., Wei, L. J., and Ying, Z. (1994). A resampling method based on pivotal estimating functions. *Biometrika* **81**, 341–350.
